1 **Field assessment of the burden and determinants of malaria transmission to inform tailoring of**  
2 **interventions (microstratification) in Ibadan and Kano metropolis: Study protocol**

3  
4 Ifeoma D. Ozodiegwu<sup>1\*</sup>, Akintayo O. Ogunwale<sup>2,3\*</sup>, Olabanji Surakat<sup>4\*</sup>, Joshua O. Akinyemi<sup>3,5,6\*</sup>, Eniola  
5 Bamgboye<sup>1,3\*</sup>, Adeniyi F. Fagbamigbe<sup>5,6</sup>, Musa Muhammad Bello<sup>3,7</sup>, Al-Mukhtar Y. Adamu<sup>3,8</sup>, Perpetua  
6 Uhomobhi<sup>9</sup>, Cyril Ademu<sup>9</sup>, Chukwu Okoronkwo<sup>9</sup>, Monsuru Adeleke<sup>4</sup>, IkeOluwapo Ajayi<sup>3,6</sup>

7  
8 <sup>1</sup>Department of Preventive Medicine and Institute for Global Health, Northwestern University, Chicago  
9 IL USA

10 <sup>2</sup>Department of Health Promotion and Education, University of Ibadan

11 <sup>3</sup>Epidemiology and Biostatistics Research Unit, Institute for Advanced Medical Research and Training,  
12 University of Ibadan

13 <sup>4</sup>Department of Zoology, Osun State University

14 <sup>5</sup>Department of Epidemiology and Medical Statistics, University of Ibadan

15 <sup>6</sup>Infectious Disease Institute, University of Ibadan

16 <sup>7</sup>Department of Community Medicine, Bayero University Kano

17 <sup>8</sup>Department of Medical Microbiology and Parasitology, Bayero University Kano

18 <sup>9</sup>National Malaria Elimination Programme

19  
20 \*Denotes first authors

21  
22 To whom correspondence should be addressed: [lfeoma.ozodiegwu@northwestern.edu](mailto:lfeoma.ozodiegwu@northwestern.edu);  
23 [ikeajayi2003@yahoo.com](mailto:ikeajayi2003@yahoo.com); [monsuruadeleke@gmail.com](mailto:monsuruadeleke@gmail.com)

24  
25  
26 Keywords: malaria, urban areas, Nigeria, mixed-methods, Ibadan, Kano, cross-sectional, longitudinal

49  
50  
51  
52  
53  
54  
55  
56  
57  
58  
59  
60  
61  
62  
63  
64  
65  
66  
67  
68  
69  
70  
71  
72  
73  
74  
75  
76  
77  
78  
79  
80  
81  
82  
83  
84  
85  
86  
87  
88  
89  
90  
91

**Abstract**

**Introduction:** Rapid urbanization in Nigerian cities may likely result in small-scale variation in malaria transmission with a higher malaria burden in informal settlements and slums. However, data is unavailable to quantify city-level variations in transmission risk and to inform selection of appropriate interventions. We are conducting field studies to understand how malaria risk varies at the smallest administrative units (wards) in two major Nigerian cities – Ibadan and Kano – to inform tailoring of interventions for cities in Nigeria’s National Malaria Strategic Plan.

**Methods and Analysis:** This is a mixed-method research design involving qualitative and quantitative research methods. We will carry out formative qualitative studies to inform sampling strategies for formal settlements, informal settlements and slums and the design of survey questionnaires. Cross-sectional surveys will be conducted in the wet and dry seasons across wards in the study cities and within different settlement types at the household and health facility levels to map all-age and under-five malaria prevalence and evaluate related risk factors. A 12-month longitudinal study among children under the age of 10 years will provide information on malaria seasonality in the two cities and related factors. Entomological surveys will be used to undertaken for eight months (four months in each season) per city to assess local transmission risk in both cities. Descriptive and regression analysis will be applied to study data to assess malaria prevalence, seasonality and related factors. Mathematical models of malaria transmission for each study ward will be developed based on study data to inform assessment of the impact of various intervention scenarios specified by the NMEP on malaria transmission.

**Ethics and Dissemination:** This protocol has been approved by Nigeria’s National Health Research Committee and relevant institutional Ethical Review Committees. Study results will be disseminated to key stakeholders and study communities.

**Strength and Limitations**

**Strengths**

- Cross-sectional and longitudinal study sampling procedures and questionnaire design are enhanced by a strong formative research foundation
- Study design and site selection are informed by modeling and local knowledge
- The combination of human and vector studies will provide detailed information on malaria transmission risk and associated drivers

**Limitations**

- Cross-sectional study may not be powered to measure all-age prevalence as sample size estimation is based on prevalence among children under the age of five years
- Study findings may not adequately measure transmission burden and risk factors in unsampled wards

## 92 **Introduction**

93 Nigeria, in addition to being the greatest contributor to the global malaria burden, is rapidly urbanizing  
94 with the attendant challenges of overcrowding and environmental degradation, leading to growing  
95 concerns that malaria transmission may increase substantially in cities [1,2] Presently, a little over half of  
96 Nigerians reside in urban centers and it is projected that this number will rise to 70 percent in 2050 [3].  
97 Infrastructural elements due to urban development are expected to reduce malaria transmission [4].  
98 However, non-uniform infrastructure planning and provision within city neighborhoods is resulting in  
99 the expansion of informal settlements, slums, and urban farms with suitable habitats for vector  
100 breeding [5,6]. In addition, the discovery of *Anopheles Stephensi*, a malaria vector adapted to urban  
101 areas, in Nigeria may intensify transmission risk for urban residents [2,7–9]. Neighborhood-level  
102 differences in environmental suitability for mosquito breeding in cities will likely lead to small-scale  
103 geographic variation in malaria burden and these need to be accounted for during intervention  
104 planning.

105  
106 Recognition of the implications of the spatial variation in malaria risk underlies the High Burden to High  
107 Impact (HBHI) response launched by the World Health Organization (WHO) in 2018 to reignite the pace  
108 towards achieving the Global Technical Strategy (GTS) targets of reducing malaria cases and deaths by  
109 75 and 90 percent in 2025 and 2030 relative to 2015 levels [10,11]. High-burden malaria countries like  
110 Nigeria where declines in malaria burden have stagnated in recent years constitute a priority for HBHI-  
111 related activities. The second element of the HBHI response calls for high-burden countries to transition  
112 from a ‘one-size-fits-all’ approach to a more targeted response to enable the deployment of the most  
113 effective malaria control tools to areas where they will have maximum impact. The Nigerian Malaria  
114 Elimination Programme (NMEP) heeded this call and, in the 2021 – 2025 National Malaria Strategic Plan,  
115 interventions were tailored for each Local Government Area (LGA). Intervention tailoring is also needed  
116 within cities, particularly targeting informal settlements, slums and neighborhoods situated close to  
117 farms as residents may be at higher malaria risk as compared to planned settlements with high-quality  
118 housing and improved environmental conditions. WHO has recommendations for targeting malaria  
119 interventions to individual geographic areas taking into account local epidemiology, ecology, health  
120 system and socio-economic characteristics and these can be used to inform intervention decisions [12].  
121 Selected intervention scenarios per locality can then be evaluated with mathematical models to  
122 understand their impact and inform the development of city-level intervention plans within national  
123 malaria strategic plans. However, data is lacking to facilitate these activities.

124  
125 City-level variations in malaria burden and risk factors are not well-understood in Nigeria. National  
126 surveys do not have sufficient sample sizes necessary for capturing intra-urban malaria risk. While  
127 clinical malaria data encompasses malaria incidence in individuals living in cities, it is biased towards  
128 those that use public health facilities; socio-economic data, human behavior, information on place of  
129 residence and travel histories and frequency are typically not collected routinely; and it often lacks a  
130 well-defined catchment population [13]. These shortcomings of clinical malaria data preclude its use in  
131 understanding spatial distribution of malaria cases, deaths and risk factors in cities. In addition, data  
132 from entomological surveys are usually not specific to urban geographies [14]. Existing research also  
133 provides limited information on the burden and drivers of malaria risk in cities [15–19] These data and  
134 information gaps motivate the need for additional studies that elucidate the burden and drivers of  
135 malaria risk in urban Nigeria to inform city-level targeting of interventions.

## 136 **Conceptualizing the geographic scale of intervention targeting within cities**

137 In urban areas, heterogeneity in epidemiological, entomological, health system and socio-economic  
138 determinants of malaria morbidity and mortality occur at fine spatial scales, such as neighborhoods,  
139

140 sub-districts, or wards, much smaller than the typical operational units of intervention targeting, states  
141 or local government areas. A cross-sectional survey of communities in Accra found that those located  
142 near urban agriculture had a higher prevalence of malaria [20]. Predictions of malaria parasite  
143 prevalence at a 10-meter grid level for the city of Dar es Salam found that higher malaria transmission  
144 risk occurred along water channels and dense vegetation [21]. However, it is often not feasible for  
145 malaria control programs to identify non-administratively defined units for intervention targeting.

146  
147 In Nigeria, wards are administratively defined units for political purposes, which may be sufficiently  
148 small enough to capture spatial variation in urban malaria risk and are easily identifiable by the state  
149 malaria programs during intervention planning and implementation. Therefore, this study will be  
150 conducted at the ward level to facilitate urban microstratification.

### 151 **Conceptualizing informal settlements and slums**

152 Spatial variations in urban malaria risk emphasize the need to delineate the features of physical spaces  
153 that contribute to malaria transmission. Informal settlements or slums bear the highest malaria burden  
154 when compared to other urban localities [22]. The extant literature suggests that environmental  
155 conditions, human mobility patterns, and inadequate access to care in informal settlements and slums  
156 drive local transmission and facilitate the importation and adaptation of parasites to cities [22–28]. A  
157 clear definition of informal settlements and slums is critical to inform sampling strategies to adequately  
158 capture heterogeneities in urban malaria risk. While several definitions of informal settlements and  
159 slums abound [29–32], the definition by the United Nations (UN) Human Settlements Programme  
160 appear to be the most widely used [29,31,33,34]. According to the UN’s definition, informal settlements  
161 “are residential areas where 1) inhabitants have no security of tenure vis-à-vis the land or dwellings they  
162 inhabit, with modalities ranging from squatting to informal rental housing, 2) the neighborhoods usually  
163 lack, or are cut off from, basic services and city infrastructure and 3) the housing may not comply with  
164 current planning and building regulations and is often situated in geographically and environmentally  
165 hazardous areas” [34]. Slums are regarded as the ‘most deprived and excluded form of informal  
166 settlements [34] and more elaborate definitions by the UN emphasize the location of slums near or on  
167 most hazardous sites, and the issue of overcrowding within slum households [33]. What is clear from the  
168 UN’s definitions and others is that definitions of informal settlements and slums should be viewed from  
169 a perspective of human rights, basic infrastructure, structural quality of housing, and location.

170  
171  
172 Studies of areas identified as slums in Nigeria depict conditions that correspond to the UN’s definition of  
173 informal settlements and slums. A 2013 study of living conditions in Ajegunle, Ijora Oloye and Makoko,  
174 some of the largest slums in Lagos metropolis found that a third of residents resided in overcrowded  
175 households consisting of an average of five persons per room and the majority lacked access to basic  
176 amenities such as piped water, electricity supply and flush toilets [35]. Similarly, a study of slum  
177 conditions in Akure, the capital of Ondo state revealed poor housing and sanitary conditions and  
178 inadequate access to health facilities [35]. While these findings support the use of the UN’s definition of  
179 informal settlements and slums to guide the selection of study sites, local understanding of the features  
180 of informal settlements and slums may reveal additional information outside the indicators provided by  
181 the UN definition, hence, this study will rely on the opinions of key community stakeholders and  
182 professional experts to inform definitions of formal and informal settlements and slums.

### 183 184 **Objectives**

185 To understand how to better tailor interventions in urban areas, we are collaborating with the NMEP to  
186 conduct human and entomological studies and use the corresponding data to construct a mathematical

187 model of urban malaria transmission for Ibadan and Kano to inform the 2026 – 2030 National Malaria  
188 Strategic Plans. These cities were chosen due to their high malaria burden (at the state-level) and the  
189 potential cost-savings to the NMEP that would result from reducing malaria transmission. Data collected  
190 from these field studies will provide insight into how to design and implement high-impact intervention-  
191 tailoring approaches in other urban settings across Nigeria. Our human studies will involve qualitative,  
192 cross-sectional and longitudinal approaches while entomological studies will be strictly longitudinal. All  
193 study types will be conducted in both Ibadan and Kano. The overarching aims of the study are to  
194 evaluate the following: 1) ward-level prevalence of malaria, 2) malaria seasonality, 3) risk factors for  
195 malaria prevalence and incidence, and 4) risk of local transmission as assessed by entomological  
196 indicators. Qualitative assessments will be used to define formal, and informal settlements and slums in  
197 study wards, and to inform survey development and study planning for both the cross-sectional and  
198 longitudinal studies. Cross-sectional studies conducted at the household-level and health facilities will  
199 provide outputs for the estimation of ward-level malaria prevalence and for identification of associated  
200 key risk factors. Longitudinal studies will inform the estimation of malaria seasonality and identification  
201 of risk factors for formal, and informal settlements and slums. Entomological studies will inform the  
202 understanding of vector species composition, larval habitats and transmission rates (Figure 1).  
203  
204

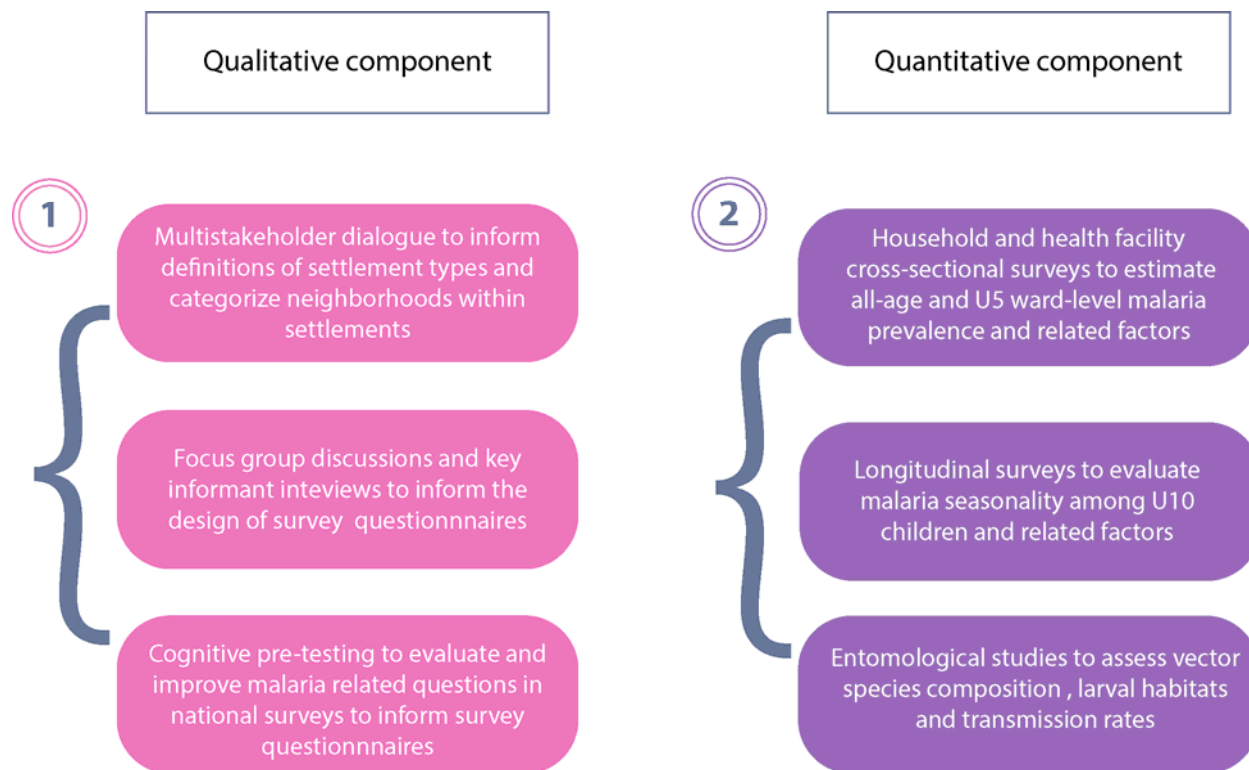

Figure 1: Study approach, types, and objectives. U5 is abbreviation for children under the age of five years and U10 means children under the age of 10 years

Data from these field studies will be used for calibration of a ward-level mathematical model for projecting the impact of various intervention scenarios on malaria burden indicators for individual wards in Kano and Ibadan metro areas. This will aid the NMEP to have a clear understanding of the implications of different intervention scenarios including the impact of deprioritizing vector control tools

214 in city wards with low transmission burden. Our mathematical modeling results will support the NMEP  
215 in identifying optimal strategies for achieving malaria control and elimination goals.

216

## 217 **Methods**

### 218 **Description of study location and study ward selection process for the prevalence, longitudinal and** 219 **entomological surveys**

220 Ibadan and Kano metro areas are the study locations. Ibadan metro area is located in Oyo state and has  
221 five LGAs further subdivided administratively into 59 wards (Figure 2A). Ward population sizes for  
222 Ibadan are presented in Figure 2B. The mean population size across all 59 wards in Ibadan is 15,408  
223 (standard

224 deviation (SD) – 12,747) [36] mean population density is 12,665 individuals per square kilometer (SD –  
225 5,802) [37]. Kano metro area is located in Kano state and comprises six LGAs, which are subdivided  
226 administratively into 66 wards (Figure 3A). Ward population sizes for Kan are depicted in Figure 3B. The  
227 mean population size across all 66 wards in Kano is 47,497 (SD – 58,981) [36] and mean population  
228 density is 23,401 individuals per square kilometer (SD – 17, 313) [37].

229

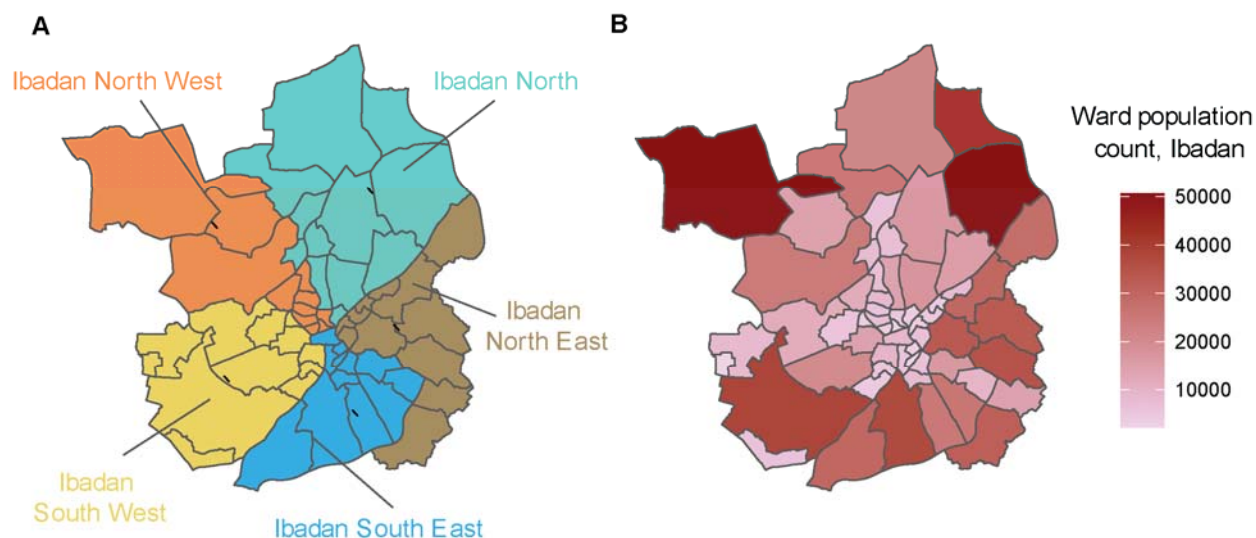

230

231

232 *Figure 2: Administrative subdivisions of Ibadan metro. A) Ward boundaries are colored by their corresponding LGAs, B) Ward*  
233 *population count*

234

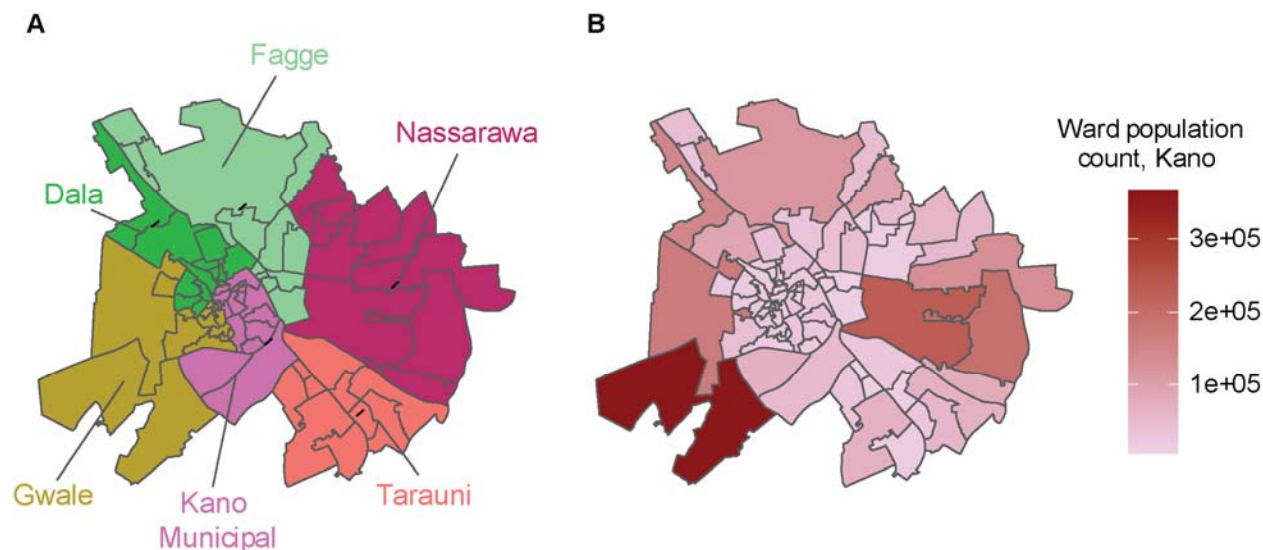

235  
236 *Figure 3: Administrative subdivisions of Kano metro. A) Ward boundaries are colored by their LGA, B) Wards in Kano population*  
237 *count*

238  
239 *Overview of the study ward selection process*

240 Given the large number of wards in LGA in Ibadan and Kano metro, we developed a process to choose a  
241 selection of representative wards from which we can extrapolate prevalence, seasonality, and  
242 entomological data to unsampled wards. Model-based clustering was used to classify wards in Ibadan  
243 and Kano metropolis into groups with similar characteristics. Site visits were conducted for at least one  
244 ward per cluster to confirm the clustering results and inform the final ward selection. Figure 4 depicts  
245 the ward selection process for Ibadan. A similar figure for Kano is available in the Supplement.

246

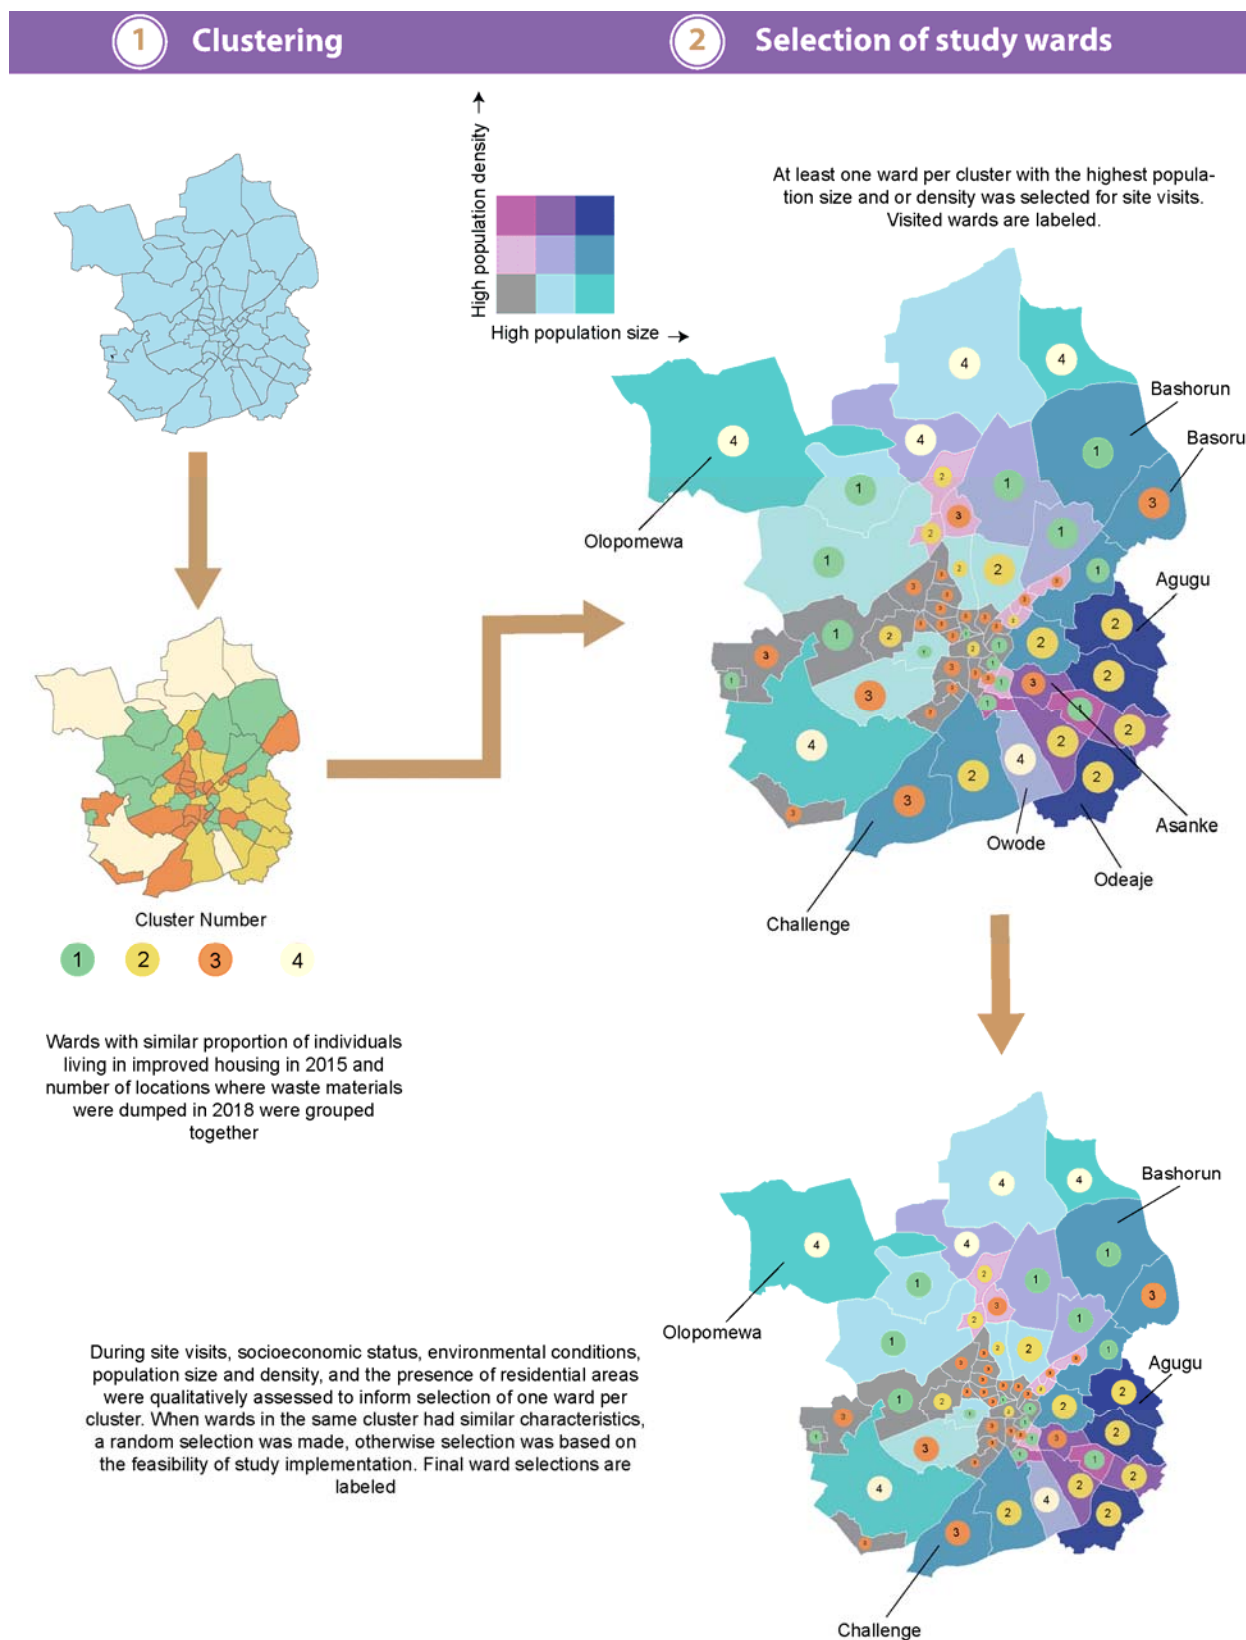

247  
248  
249  
250

Figure 4: Overview of methods used to select study locations in Ibadan metropolis for the household, longitudinal and entomological surveys. Wards visited for ground truthing and final ward selections are labeled. Similar methods were used for ward selection in Kano metropolis



251  
252  
253  
254  
255  
256  
257  
258  
259  
260  
261  
262  
263  
264  
265  
266  
267  
268  
269  
270  
271  
272  
273  
274  
275  
276  
277  
278  
279  
280  
281  
282  
283  
284  
285  
286  
287  
288  
289  
290  
291  
292  
293  
294  
295  
296  
297

### Clustering

Estimates of malaria prevalence and seasonality and entomological parameters for each ward are essential for mathematical models to capture small-scale spatial variations in malaria transmission to provide projections of their impact, given an intervention scenario. However, generating such measures of transmission would be infeasible given limited resources. Clustering methods can be used to identify wards with similar socioeconomic and environmental characteristics to inform the extrapolation of transmission metrics from sampled to unsampled areas. We applied model-based clustering with variable selection as an empirical approach to classify wards into clusters [38]. Initial variables considered for clustering in Ibadan and Kano were ward-level data on population density [39], mean k-complexity (a measure of settlement informality) [40], enhanced vegetation index [41], measures of settlement type classification (received through email communication from Gates Foundation GIS Team), and proportion of individuals living in improved housing in 2015 [42]. An additional variable included in the clustering model solely for Ibadan was the number of locations where waste materials were dumped in 2018 [43]. After variable selection, data on the proportion of individuals living in improved housing in 2015 [42] and the number of locations where waste materials were dumped in 2018, was used to group wards in the Ibadan metro area into four clusters. Similarly, wards in the Kano metro area were aggregated into five clusters using data on the proportion of individuals living in improved housing in 2015 [42]. The selection of cluster partitions were based on Bayesian Information Criteria (BIC) values, that is those with the lowest BIC values were selected. Following the clustering procedure, one to three potential study locations, with either the largest population size and/or population density, per cluster were selected for site visits to inform decisions on the final selection of one study location per cluster (Table 1). Where one ward had both the highest population size and density, the ward with the next highest population size was chosen. Population size and density were chosen as the selection criteria for study wards on the assumption that selected areas will comprise individuals of different socioeconomic status and this diversity will result in the generation of representative estimates of transmission within their cluster partition.

### Site visits

Due to funding limitations, only one ward could be selected per cluster. Therefore, the study team conducted site visits to confirm the clustering results and inform final ward selections by assessing whether selected wards had residential areas and qualitatively comparing location characteristics within clusters where two or more potential study wards were selected during the clustering procedure. Eight potential study wards (Figure 4 and Table 1) were visited in the Ibadan metro area and ten wards were visited in the Kano metro area. The study team captured pictures of residential houses and roads in each area, and qualitatively assessed and compared socioeconomic status, environmental conditions, and population size and density for wards in the same cluster, where two or more wards were selected. Reports from the site visits in the Ibadan metro area, for instance, suggested that wards in clusters 2 were similar with respect to housing quality and road and neighborhood infrastructure while wards grouped into clusters 1 in Ibadan metro area were noted to be vastly different. To elaborate, most neighborhoods in Olopemewa had tarred roads in contrast to Owode. For Kano, clustering methods captured similarities in housing quality in wards in cluster 1 but not in cluster 3- housing infrastructure in Dorayi and Goron Dutse were similar but in Tudun Wazurchi, they were of lower quality than those in Sani Mainagge. Additionally, individuals residing in Tudun Wazurchi were regarded as having a low-income status compared to those in Sani Mainagge. Given the varying performance of the clustering

298 methods for different clusters, decisions on study wards in clusters with dissimilar housing and  
299 environmental conditions relied on the the opinion of the field team on ease of study implementation.  
300 The selected study wards in Ibadan were four - Olopomewa, Challenge, Agugu and Bashorun while in  
301 Kano metro area they were five - Dorayi, Fagge D2, Tudun Wazurchi, Gobirawa, and Zango (Table 1). The  
302 final selected study locations represent a diversity of environmental and living conditions in both Ibadan  
303 and Kano metropolis. Site visit notes and pictures for each ward are available upon reasonable request  
304 to the authors.

305  
306  
307

Table 1: Potential and final study wards

| Cluster number | Ibadan metro area*                 | Kano metro area*                      |
|----------------|------------------------------------|---------------------------------------|
| 1              | Owode, <b>Olopomewa</b>            | <b>Dorayi</b> , Goron Dutse           |
| 2              | <b>Challenge</b> , Basorun, Asanke | <b>Fagge D2</b> , Kwachiri            |
| 3              | Ode Aje, <b>Agugu</b>              | <b>Tudun Wazurchi</b> , Sani Mainagge |
| 4              | <b>Bashorun</b>                    | <b>Gobirawa</b> , Kofar Ruwa          |
| 5              |                                    | <b>Zango</b> , Shahuchi               |

308 \*final study wards are in bold

309

### 310 **Qualitative study methods**

#### 311 Defining formal and informal settlements and slums, and categorizing neighborhoods by settlement 312 types using Multi-stakeholders' Dialogues (MSDs) to inform sampling plans

313 Multi-stakeholders' dialogues will be held to define formal and informal settlements and slums and to  
314 categorize neighborhoods by settlement types to inform the sampling strategy within selected wards.  
315 Multi-stakeholders' dialogues or roundtables are structured processes used to bring stakeholders  
316 together to develop a shared understanding of issues, evidence and plans of action [44]. One MSD will  
317 be conducted per city. The MSDs will use a participatory community mapping approach. During a  
318 roundtable discussion, participants will reach a consensus on the characteristics of different settlement  
319 types. Each participant will then be given a form and asked to provide general impressions of the study  
320 wards and to record the number of communities/neighborhoods that can be described as formal  
321 settlements, informal settlements, or slums. Subsequently, participants familiar with or residing in each  
322 of the study wards will be asked to sketch a community map with detailed descriptions of various  
323 settlement types and to present the final product to the full group of participants for feedback. To  
324 facilitate the map sketching process, participants will be provided with a validated map of each ward  
325 showcasing major landmarks and streets.

326

327 A total of 10 participants will be recruited for the MSDs in Ibadan and Kano, respectively. Participants  
328 will include a Town Planner or a Quantity Surveyor from the State Ministry of Lands and Housing, a  
329 Building/Structural Engineer from State Ministry of Works, a Surveyor from the Office of the Surveyor-  
330 General, a Statistician/Demographer or Population Expert from State Bureau of Statistics and an  
331 academic with expertise in Urban Planning or Geography. Other categories of participants that will be  
332 included in the MSDs are two stakeholders who work as Estate Managers/Agents and two community  
333 members residing in a formal and informal settlement as well as one intra-city experienced commercial  
334 taxicab or shuttle driver who is familiar with various areas within the metropolis. The recruitment of  
335 pertinent stakeholders for the MSDs will be facilitated using purposive and snowballing procedures.  
336 Community gatekeepers and heads or senior officials in various relevant ministries and institutions will  
337 be consulted and engaged for the purpose of recruiting distinguished and well-informed individuals for  
338 the MSDs. In addition to the 10 participants that will be involved in each of the MSDs, a stakeholder  
339 from the state level/office of NMEP will be involved in the dialogue as a non-participant observer. The  
340 Supplement includes a matrix showing details of the description of the participant types and how each

341 participant will be sampled, the study guide and a sample of the informed consent form for the MSDs.  
 342 The MSDs will be audio-taped and led by a rapporteur and two facilitators (moderators) who are experts  
 343 in qualitative research and community engagement .  
 344

345 *Focus group Discussions and Key Informant Interviews to inform the design of human survey questions*

346 In Ibadan and Kano metro areas, Focus Group Discussions (FGDs) and Key Informant Interviews (KIIs) will  
 347 be conducted among purposively selected participants spread across various communities using guides  
 348 comprising open-ended questions and prompts (See Supplement pages 16 - 43) with goal of generating  
 349 information to guide the design of the quantitative study. The FGDs and KIIs will be designed to explore  
 350 the following: 1) community management of suspected malaria infections, 2) malaria health-seeking  
 351 behaviors, 3) how to best support study participants to recall whether and what malaria medications  
 352 were used for treatment after a suspected or confirmed malaria episode, and 4) methods employed by  
 353 community members to protect themselves from malaria. As shown in Table 2, the FGDs will target  
 354 community members comprising caregivers of under-fives, adult male and adult female groups, one  
 355 each in formal, informal settlements, and slums (Areas designated as formal, informal settlements and  
 356 slums will be based on the products of the MSDs). Each FGD group will comprise 8 – 12 participants. A  
 357 minimum of eleven FGDs each will be conducted in Ibadan and Kano, respectively, of which two FGDs  
 358 will be used to pre-test the study instruments. Data will be collected up till a point of saturation. For  
 359 each FGD, participants will be recruited purposively and with the help of community gatekeepers or  
 360 community liaison officers. Community gatekeepers and/or community liaison officers will also be  
 361 identified through a community engagement process.  
 362  
 363

364 *Table 2: Anticipated number of focus groups per city and description of potential participants and purpose of each discussion*

| Recruitment target population | Anticipated number of FGDs                       | Purpose                   |
|-------------------------------|--------------------------------------------------|---------------------------|
| Male and female adults        | 2 (one FGD for males and females, respectively ) | Pretest study instruments |
| Caregivers of under-fives     | 3 (one FGD per settlement type)                  | Obtain group perspectives |
| Adult male                    | 3 (one FGD per settlement type)                  | Obtain group perspectives |
| Adult female                  | 3 (one FGD per settlement type)                  | Obtain group perspectives |
|                               | <b>Total number of FGD: 11</b>                   |                           |

364 The KIIs will target community, formal health sector and informal health sector stakeholders in the  
 365 different settlement types in Ibadan and Kano. Table 3 presents information on the recruitment targets  
 366 and anticipated number of KIIs for each group. Key informants will be recruited purposively from various  
 367 areas and settlement types within the study sites. A minimum of twenty KIIs will be conducted in  
 368 addition to two KIIs, which will be used to pretest the study instruments. The final number of FGDs and  
 369 KIIs will depend on our team’s assessment of data saturation. A separate KII guide will be used for each  
 370 of the three categories of the key informant interviewees, namely, community stakeholders, health  
 371 workers in formal healthcare sectors and healthcare providers in informal sectors.  
 372  
 373  
 374

374 *Table 3: Description of key informant interview types, recruitment targets and proposed number of interviews per city*

| Key informant interview (KII) target stakeholder | Recruitment target population                                                                                     | Anticipated number of KIIs | Purpose                                  |
|--------------------------------------------------|-------------------------------------------------------------------------------------------------------------------|----------------------------|------------------------------------------|
| Health sector stakeholders                       | Formal health worker and informal health worker                                                                   | 2 KIIs                     | To pretest study instruments             |
| Community stakeholders                           | Community/opinion leaders, traditional leaders (one community leader from each of the three types of settlements) | 4 KIIs                     | To obtain key stakeholders’ perspectives |
| Formal health sector stakeholders                | Heads of primary health care centres, PHC coordinators, LGA medical officers, LGA Roll-                           | 10 KIIs                    | To obtain key stakeholders’              |

|                                     |                                                                                                                                                                                                   |                                 |                                          |
|-------------------------------------|---------------------------------------------------------------------------------------------------------------------------------------------------------------------------------------------------|---------------------------------|------------------------------------------|
|                                     | back Malaria Focal Persons, Public and private sector pharmacists and doctors, and State Malaria Programme Officers                                                                               |                                 | perspectives                             |
| Informal health sector stakeholders | Patent Medicine Vendors, drug peddlers/hawkers, traditional/herbal healers (two separate KIIs from each of the typologies of informal health workers across the three different settlement types) | 6 KIIs                          | To obtain key stakeholders' perspectives |
|                                     |                                                                                                                                                                                                   | <b>Total number of KIIs: 22</b> |                                          |

375  
 376 The KIIs and FGDs will be conducted by a team of two trained Research Assistants (RAs) comprising a  
 377 moderator and a recorder/note-taker and will be supervised by field supervisors, a quality assurance  
 378 manager, and the social scientist/qualitative research expert on the research team. All KIIs and FGDs will  
 379 be audio-taped. Study RAs will be university graduates with experience in conducting qualitative  
 380 research and will be fluent in English language as well as Yoruba and Hausa for Ibadan and Kano study  
 381 sites respectively. The selection of RAs will be gender sensitive. The FGDs and KIIs will be conducted in  
 382 locations where the privacy of participants can be guaranteed.

383  
 384 Cognitive pretesting of questions from the Nigerian Demographic and Health Surveys to inform the  
 385 design of human survey questions

386 The Demographic and Health Survey questionnaire comprise validated malaria illness-related, health-  
 387 seeking, and financial status-related questions that may be useful for the study. To assess its utility  
 388 among the study population, recall and comprehension of pertinent questions will be assessed among  
 389 mothers of under-five children using cognitive pretesting (see Supplement pg 51 for guide). Cognitive  
 390 pretesting, also known as Cognitive Interview (CI), will allow the study team to generate suggestions for  
 391 improving assessed questions in the quantitative surveys.

392  
 393 A minimum of four caregivers of under-five children will be purposively selected across Ibadan and  
 394 Kano metro areas for the CIs. Each CI will be facilitated by a moderator and a note-taker. The CIs will be  
 395 conducted to a point of data saturation.

396  
 397  
 398 **Cross-sectional study methods**

399 Household surveys

400 To assess ward-level malaria prevalence among all-ages, and children under the age of five years as well  
 401 as related factors (socio-economic, behavioural, intervention coverage, mobility), household-based  
 402 surveys of individuals of all ages, including pregnant women, from the different settlement typologies  
 403 will be conducted in the wet season (May – August) and dry seasons (November – February) in the study  
 404 wards in Ibadan and Kano. The same households will be sampled in the dry and wet seasons. Survey  
 405 instruments are presented in the Supplement (page 57), and will be revised based on the results of the  
 406 qualitative study. A positive Rapid Diagnostic Test (RDT) will be used to detect the presence of malaria  
 407 infection. Individuals with fever (axillary temperature 37.5<sup>0</sup>C) and a positive RDT test will be given a  
 408 treatment dose of artemether lumefantrine or referred to the health facility. Severe malaria, severe  
 409 anemia, non-malarial illnesses, or illnesses judged to require more than oral antimalarial treatment will  
 410 be referred to local health facilities. Blood spot samples will be collected on filter paper and stored for  
 411 further analysis using polymerase chain reaction (PCR). The sampling frame will be extracted from the  
 412 2006 National Population and Housing Census of the Federal Republic of Nigeria (NPHC), conducted by  
 413 the National Population Commission (NPC). Each ward is subdivided into census enumeration areas  
 414 (EAs) and the EA will serve as the Primary Sampling unit (PSU). The number of households and

415 population for each EA will be based on data from the 2021 National Population Commission Household  
416 survey.

417  
418 *Initial household and individual-level sample size estimation:* Survey sample size estimation was based  
419 on cluster sampling methodology. Malaria prevalence estimates of children under the age of five years  
420 from all urban clusters in Oyo and Kano state in the 2018 NDHS (29% and 27% prevalence, respectively)  
421 were used to approximate ward-level prevalence estimates in all ages and children under the age of five  
422 years in Ibadan and Kano, respectively. Expected prevalence values were combined with a design effect  
423 (*Deft*) of 1.2, a relative standard error ( $\alpha$ ) of 0.05, and an assumption of a 90% response rate at the  
424 household ( $R_h$ ) and individual levels ( $R_i$ ) to estimate the number of households per study ward as  
425 1,741 in Ibadan and 1,923 in Kano. The formula below was used for the household sample size  
426 estimation.

$$n = Deft^2 \times \frac{1/P - 1}{\alpha^2}$$

428  
$$n_i = \frac{n}{R_h * R_i}$$

429  
430 Where  $n$  is the household interview sample size without accounting for non-response, and  $n_i$  is the  
431 household interview sample size after adjustment for non-response

432  
433 Rapid diagnostic tests are expected to be administered to five or fewer individuals per household  
434 depending on the household size. If the overall average number of individuals per household is assumed  
435 to be 3.9 persons in Ibadan and 5.7 persons in Kano, the number of individuals expected to be available  
436 for RDT, after accounting for a 90% response rate, is estimated to be 6,111 per ward in Ibadan and 7,835  
437 per ward in Kano.

438  
439 *Final sample sizes after sample allocation:* To allocate household interview sample size estimates of  
440 1,741 and 1,923 per ward in Ibadan and Kano respectively, we will stratify communities into formal,  
441 informal and slum settlements using the criteria for defining settlement type obtained from the MSDs.  
442 Subsequently, we will select 35 settlements (enumeration areas (EAs)) from each study ward in both  
443 Ibadan and Kano. Within each ward, the 35 EAs will be selected proportional to the ratio of formal  
444 settlements to informal settlements to slum settlements. Dividing the total household sample size  
445 (1,741 and 1,923 respectively in Ibadan and Kano) by the 35 enumeration areas to be selected, we  
446 estimate that 50 households (after rounding to the nearest whole number) will be interviewed per  
447 enumeration area in Ibadan and 55 in Kano. This implies that a total of 1,750 and 1,925 households will  
448 be sampled per ward in Ibadan and Kano respectively. The RDTs expected to be administered per study  
449 ward, per season in Ibadan (under the same assumption of 3.9 persons per household in Ibadan and 5.7  
450 persons in Kano), after adjustment for a 90% response rate, will then be 6,142 in Ibadan and 8,663 in  
451 Kano. Across all four wards in Ibadan and for each season, 7,000 households are expected to be sampled  
452 and 24,568 RDTs are expected to be administered while in Kano, 9,625 households are expected to be  
453 sampled and 43,315 RDTs administered in all five wards in Kano and for each season.

454  
455 *Household sampling strategy:* In the study wards in Ibadan and Kano metropolis, study households will  
456 be randomly selected and household heads or representatives will be interviewed. RDTs will be  
457 administered to all individuals in the household when the number of household members is five or

458 fewer. When there are more than 5 household members, they will be stratified into five age groups (0 -  
459 5, 6 - 10, 11 - 17, 18 - 30, and >30), and one member from each group will be tested. In households  
460 where individuals are missing in a particular age category and household members are more than five,  
461 this will be compensated for by testing an additional household member in the youngest age category.  
462 Household residents tested for malaria using RDTs will also provide blood spot samples. RDTs and blood  
463 spot sample collection with filter paper will be performed by research assistants/laboratory  
464 technologists who will undergo a two-day training workshop on survey procedures and a refresher  
465 course on sample collection procedures and malaria diagnosis with RDT. Participants will provide a  
466 single blood sample for the malaria RDT and collection with filter paper. RDT results will be read as per  
467 the manufacturer's instructions and recorded separately on the patient's questionnaire. Test results will  
468 be passed to the health care provider to use in managing the patient. Blood spot results will be used for  
469 later confirmation of RDT results with PCR at the conclusion of field work. Data and location data will be  
470 collected via interviewer-administered questionnaires using GIS-enabled Android tablets. This will  
471 enable online and real-time access to collected data.

472  
473 *Computation of sampling weights:* Sampling weights will be applied because of the non-proportional  
474 allocation of the sample size to the different wards and the potential differentials in response rates  
475 across the wards. The sampling weight per individual will be the inverse of the first-stage sampling  
476 probability of an EA from a specific ward and the inverse of the second-stage sampling probability of the  
477 household.

#### 478 479 Health facility surveys

480 To support the mapping of malaria prevalence among children under the age of five years within  
481 unsampled wards in Ibadan and Kano metro area, Health Facility Surveys (HFS) will be conducted among  
482 pregnant women using survey instruments presented in the Supplement (pages 74-75). These  
483 instruments will be revised based on the results of the qualitative study. We will recruit pregnant  
484 women attending antenatal care (ANC) for the first time during their first pregnancy and residing in any  
485 ward in Ibadan and Kano metropolis. We are recruiting women during their first pregnancy  
486 (primigravidae) as this was found to have the best correlation with malaria prevalence in children under  
487 the age of five compared to all gravidae and multigravida [45]. Those presenting with emergency  
488 conditions will be excluded. Similar to the cross-sectional survey, a positive RDT test will be used to  
489 detect the presence of malaria infection and dried blood spot samples will be collected on filter paper  
490 for PCR. Those testing positive for malaria will be treated according to national guidelines. Ward  
491 residence data will be collected for each respondent to facilitate mapping of malaria prevalence in  
492 unsampled wards.

493  
494 *Health facility selection:* Using data for first-time ANC attendees in 2021 from the Nigeria District Health  
495 Information System (DHIS2), as provided by the NMEP, one non-tertiary health facilities with the largest  
496 ANC attendance was purposively selected for the HFS per LGA in Ibadan and Kano metro. The study  
497 locations were selected from LGAs in Ibadan and Kano metro rather than wards because the catchment  
498 area for health facilities is typically at the LGA-level. The HFS will be conducted monthly for three  
499 months in each health facility during the wet and dry seasons respectively.

500  
501 *Sample size estimation and allocation:* Due to a paucity of literature on malaria prevalence among  
502 pregnant women residing in Ibadan and Kano metropolis, the ward-level sample size was estimated  
503 based on a proportion of 50% positivity among new ANC attendees using a similar method as the NDHS  
504 surveys [46]. A design effect of 1.5 was used to account for the clustering of pregnant women in a health  
505 facility and RSE was kept at 5%. The same prevalence was assumed for each month of the year.

506 Therefore, the sample size was initially calculated per month using the formula below to get an estimate  
 507 of 900 ANC attendees per city.  
 508

$$n = Deft^2 \times \frac{1/P - 1}{\alpha^2}$$

509  
 510 Where:  $P$ =assumed malaria prevalence among pregnant women;  $\alpha$  = RSE and  $Deft$  = Design effect  
 511

512 Because the target population of new ANC attendees per month in Ibadan and Kano was less than 900,  
 513 the estimated sample size was further adjusted for the population size using the average number of ANC  
 514 attendees between July and September from data provided by the NMEP from routine surveillance. The  
 515 final sample was then calculated using the finite population correction formula below.

$$n' = \frac{n}{1 + \frac{n}{N}}$$

516  
 517 Where:  $n$  = estimated sample size;  $N$  = Average of total ANC attendance and  $n'$  = final sample size  
 518 estimate  
 519

520 Following adjustment for 85% response rates, the sample size per month for Ibadan and Kano was  
 521 computed as 406 and 775 new ANC attendees, respectively. The overall anticipated sample size for six  
 522 months (3 months per season) in Ibadan is 2,436 in Ibadan, and 4,650 in Kano. Detailed sample size  
 523 allocation for Ibadan and Kano metro are shown in Tables 4 and 5. Sample size allocation for each health  
 524 facility was proportional to its average ANC attendance from July – September 2021 (Table 4 and 5).  
 525

526 *Table 4: Sample size allocation for HFS in Ibadan metro*

| LGA               | Health Facility             | Average of total new ANC attendees (July – September) | Sample size allocation |
|-------------------|-----------------------------|-------------------------------------------------------|------------------------|
| Ibadan North-East | Oluyoro Catholic Hospital   | 69                                                    | 50                     |
| Ibadan North      | Adeoyo Maternity Hospital   | 200                                                   | 145                    |
| Ibadan North-West | Naomi Medical Centre        | 47                                                    | 34                     |
| Ibadan South-East | Oranmiyan PHC               | 131                                                   | 95                     |
| Ibadan South-West | Jericho Specialist Hospital | 113                                                   | 82                     |
|                   | <b>Total</b>                | <b>560</b>                                            | <b>406</b>             |

527  
 528 *Table 5: Sample size allocation for HFS in Kano metro*

| LGA            | Health Facility        | Average of total new ANC attendees (July – September) | Sample size allocation |
|----------------|------------------------|-------------------------------------------------------|------------------------|
| Dala           | Dala PHC               | 431                                                   | 136                    |
| Fagge          | RijiyarLemo MCH Clinic | 365                                                   | 115                    |
| Gwale          | Ja'En PHC              | 511                                                   | 161                    |
| Kano Municipal | Sharada PHC            | 315                                                   | 99                     |
| Nasarawa       | Gwagwarwa PHC          | 538                                                   | 169                    |
| Tarauni        | Unguwa Uku PHC         | 300                                                   | 95                     |
|                | <b>Total</b>           | <b>2460</b>                                           | <b>775</b>             |

529

530 *Sample collection:* All new ANC attendees at the facility will be interviewed and screened for malaria  
531 using RDT until the required number per health facility and month is achieved. The data to be collected  
532 will be similar to the information collected in the household cross-sectional surveys. New ANC attendees  
533 will be screened for malaria with RDT and interviewed in a specially designated area/room (that can  
534 guarantee confidentiality of information) in the health facility by research assistants/laboratory  
535 technologists who will undergo a two-day training workshop on survey procedures and a refresher  
536 course on blood sample collection and malaria diagnosis using RDT. Each pregnant woman will provide a  
537 single finger-prick blood sample for the malaria RDT and additional confirmation with PCR using blood  
538 spot samples at the conclusion of the study. The RDT results will be read as per the manufacturer's  
539 instructions and recorded separately on the patient's questionnaire. Test results will be passed to the  
540 health care provider to use in managing the patient. Data will be collected via interviewer-administered  
541 questionnaires using GIS-enabled Android tablets.

542  
543

#### 544 **Longitudinal surveys**

545 To estimate malaria seasonality and related factors, a sample of children, 0 – 10 years, will be followed  
546 for 12 months and data will be collected using survey instruments in the Supplement (page 95).

547 *Sample size:* We used an open-source sample size calculator provided by OpenEpi [47] for cohort studies  
548 (<https://www.openepi.com/SampleSize/SSCohort.htm>) to estimate the sample size per ward. An initial  
549 sample size of 228 per ward was estimated, based on Fleiss et al. [48]. All parameters used as input for  
550 the sample size calculation are provided in Table 6. Adjusting for 20% attrition, the minimum sample size  
551 was computed as 285 children per ward. Two wards that have a good mix of formal and informal  
552 settlements from the selection made for the cross-sectional survey will be purposively selected in  
553 Ibadan and Kano. The total sample size for the two study wards each in Ibadan and Kano will be 570  
554 children.

555  
556

*Table 6: Parameters used for computing longitudinal study sample size*

| Parameter                                                             | Value (source)                                                              |
|-----------------------------------------------------------------------|-----------------------------------------------------------------------------|
| Two-sided significance level                                          | 95%                                                                         |
| Power                                                                 | 80                                                                          |
| Ratio of unexposed to exposed in sample                               | 1.0                                                                         |
| Percent of unexposed with outcome (percent of ITN users with malaria) | 30.33% (based on malaria incidence estimates from the WHO Observatory [49]) |
| Risk Ratio                                                            | 0.49 [50]                                                                   |

557

558 *Participant selection and field methods:* Participants will be selected/recruited at the community level. A  
559 household listing will be carried out and used as a sampling frame for a random selection of eligible  
560 households with mother-child pairs. To be eligible for enrollment, the mother-child pair should be  
561 residing in the household for the next year. Two individuals residing within each study ward will be  
562 recruited and trained as Community Monitors (CM) to identify eligible study participants, conduct  
563 interviews, and administer RDT tests on the study participants. Additionally, a supervisor will be trained  
564 to oversee the activities of the CMs in each ward, and monitor data collection and follow-up. The study  
565 will be explained to mothers/caregivers of children and those who give informed consent will be  
566 enrolled. Participating mothers/caregivers and the selected children will be visited at home once in a  
567 month during the one-year follow-up and will be encouraged to visit the CMs any time a child enrolled  
568 in the study has a case of suspected uncomplicated malaria.

569

570 At the initial visit, the CMs will collect information regarding the participant's family, including basic  
571 demographic information and information and the use of malaria prevention practices. Participants will



572 also be informed to report to the CMs in their ward whenever their under-five child develops a febrile  
573 illness. At each monthly visit, the CMs will administer a standardized questionnaire, collecting  
574 information regarding illnesses that had occurred since the last visit, symptoms experienced, use of  
575 health-care facilities, and use of medicines and vector control tools. In addition, information on travel  
576 history and the cost of treatment will be collected. Anthropometric measurements will also be done.  
577 Axillary temperatures and finger or heel prick (neonates) blood samples will be collected for RDT to  
578 determine parasitemia and blotted samples for PCR on filter paper will be obtained for confirmation of  
579 cases detected using RDT. Any recruited child with documented fever (axillary temperature  $37.5^{\circ}\text{C}$ ) and  
580 malaria parasitemia judged to be uncomplicated malaria will be given a treatment dose of artemether  
581 lumefantrine or referred to the health facility. Severe malaria, severe anemia, non-malarial illnesses, or  
582 illnesses judged to require more than oral antimalarial treatment will be referred to local health  
583 facilities. To reduce loss to follow-up, we shall have the telephone numbers of the mother/caregiver as  
584 well as that of a very close person/another household member whom we can call to check his/her  
585 whereabouts. During non-scheduled visits with the CM, that is when the child has a case of suspected  
586 uncomplicated malaria, similar protocols as in the monthly visits will be followed.

587

588

### 589 Entomological surveys

590 To understand the larval habitats, indoor and outdoor transmission rates, species composition and  
591 dynamics, biting rates and inoculation rates of *Anopheles* vectors, entomological surveys will be  
592 conducted for four months in the dry and wet season, respectively.

593

594 *Selection of the study sites:* Due to funding limitations and because we do not expect vector dynamics to  
595 vary widely across wards with similar environmental conditions, three wards each will be selected in  
596 Kano and Ibadan from the study ward selections in Table 2 informed by the outcome of the MSDs. In  
597 each ward, a site for indoor and outdoor mosquito collection will be established in accordance with  
598 NMEP protocol for entomological surveys. Households selected for the entomological study will be from  
599 those enrolled in the longitudinal study. Study households will be mobilized and asked to complete  
600 informed consent forms (See Supplement page 102).

601

602 *Indoor and outdoor mosquito collection with Centers for Disease Control (CDC) light trap:* CDC light traps  
603 will be set-up indoor and outdoor in the selected house in each site. The trap will be suspended at 1.5m  
604 towards the leg of an adult sleeping inside an untreated bednet. The traps will be operated between  
605 6pm to 6 am for three consecutive days per month in accordance with NMEP protocol for routine indoor  
606 and outdoor collection of mosquitoes using CDC light traps. The cups of the traps will be collected hourly  
607 and mosquitoes by the traps will be killed by chloroform and recovered into well labeled cups for  
608 identification.

609

610 *Collection of indoor resting mosquitoes using Pyrethrum Spray catches:* Pyrethrum Spray Catch (PSC) will  
611 be conducted monthly in ten randomly selected houses in each site. This is to collect indoor resting  
612 mosquitoes. The method involves spreading a white cloth to cover all the space in the selected  
613 household after which an insecticide is sprayed by the Entomologist. The mosquitoes that fall on the  
614 cloth will be recovered into the petri-dishes using forceps. The petri-dishes will be labelled and  
615 transported into the laboratory for identification.

616

617 *Collection of Environmental data:* On each trapping day, a digital device (Thermo Pro, remote sensor  
618 433MHz wireless- Model TP-60) will be used to collect indoor and outdoor temperature as well as  
619 relative humidity. The data will be recorded in hardcopy forms.

620

621 *Management and identification of collected mosquitoes:* Mosquitoes collected in the field (Indoor,  
622 outdoor and PSC) will be transported into the laboratory and sorted based on an hourly catch. The  
623 female *Anopheles* mosquitoes will be identified using keys described by Coetze and Gillies [51] and  
624 Gillet [52]. The number of each species of female *Anopheles* mosquitoes identified will be recorded.  
625 Each female *Anopheles* mosquitoes will be identified will be coded and preserved in silica-filled  
626 18uardian18 tube (1.5ml) and transported to the NMEP-accredited Molecular Biology Laboratory at  
627 Osun State University for molecular identification of species, blood meal source and sporozoite rate  
628 using detailed protocols provided in the Supplement (pages 106 – 111) .

629

630 *Prospection of the breeding sites and duration:* Larval sampling will be carried out in all selected wards in  
631 Kano and Ibadan metropolis in both the wet and dry seasons. The microhabitats of potential breeding  
632 sites such as puddles, vehicle tires, septic tanks, gutters, tire tracks, wells and run-offs will be  
633 prospected. Prospective breeding sites will be selected and sampled using standard dippers [53]. Larvae  
634 encountered will be transferred to the collection bowl and taken to a laboratory. The following list  
635 describes the procedure for mosquito larval collection at breeding sites:

636

- 637 1. Larval sampling will be done between 0700 to 0900 hours. Water bodies such as swamps,  
638 ditches, streams, water puddles, pools, rice fields, drainage, tire tracks, domestic container,  
639 tree holes, domestic well, footprint etc. will be located.
- 640 2. The dipper will be lowered gently at an angle of about 45° to enable water and nearby  
641 larvae to flow into the dipper.
- 642 3. The content of the dipper will be emptied into a container and transported to the  
643 laboratory. Five dips will be taken per breeding sites in accordance with standard protocol  
644 as published in previous studies [45-47].
- 645 4. For each sampling operation, the following will be recorded: a) Geographic location (GPS  
646 coordinates), b) Name of locality, c) Type of breeding sites (permanent, semi-permanent or  
647 temporary), d) Source of the water (rain, river, lagoon or man-made), e) Nature of water  
648 collection (puddle, rice-fields, etc.), and f) Number of larvae per dip.

648

649 *Larval identification and species characterization:* The larvae will be reared to emerge into adults and  
650 then identified morphologically using standard protocols for female *Anopheles* mosquitoes. Molecular  
651 identification will be carried out as described in the Supplement (Pages 106 – 111).

652

653

#### 654 **Public Involvement**

655 This study is conducted at the request of the NMEP and in partnership with them to generate evidence  
656 to inform intervention tailoring in urban areas in the 2026 – 2030 National Malaria Strategic Plan. Prior  
657 to the start of the study, the study team met with the NMEP to discuss and refine the study design and  
658 review evidence to inform selection of the study sites. Plans are in place to enable representatives of the  
659 State and National Malaria Elimination Programme to serve as observers during data collection.

660

661 Mobilization meetings will be held with the key stakeholders before the commencement of the cross-  
662 sectional, longitudinal and entomological studies, including: 1) The National Coordinator, Head,  
663 Integrated Vector Management, and Head of Case Management of NMEP 2) Malaria Programme  
664 Managers in Kano and Oyo States, 3) LGA Malaria Coordinators in the Selected LGAs, and 4) community  
665 leaders of the selected communities and households. The study protocols will be explained to all  
666 stakeholders including the households to be used for the study.

667

668 **Data analysis plan**

669 *Qualitative data:* Data processing will start with the verbatim transcribing of tape recordings of the  
670 MSDs, FGDs, KIIs and Cis immediately after the data collection to avoid loss or omission of important  
671 details. Results of the MSDs, FGDs as well as the interviews (KIIs and Cis) conducted in Yoruba and  
672 Hausa, will be translated into English to ascertain the quality of the data. All transcribed notes will be  
673 audited and validated by project team members. Validated transcribed notes will be entered into the  
674 computer using NVIVO version 12 Pro. Inductive-dominant coding approach will be used to drive the  
675 coding process [35]. Parent nodes (primary codes) and child nodes (secondary codes) will be generated  
676 based on the content of the data. The codes will be linked appropriately to the corresponding  
677 quotations. Memos will be created as necessary and linked with appropriate codes and quotations. The  
678 generated codes and the quotations will be reviewed and critiqued carefully by the data analyst and  
679 experienced qualitative research experts on the project team.

680  
681 Thematic content analysis will be performed, and generated themes will be based on the (a) content of  
682 the study instrument (b) sample quotes from transcripts; and (c) peer review and reflections  
683 (contributions from members of the project team). Based on the step-by-step approach of thematic  
684 analysis identified by Nowell et al [36], the verbatim transcript of each of the MSDs, FGDs and interviews  
685 (KIIs and Cis) will be carefully read, examined and juxtaposed theme by theme to identify relevant texts,  
686 repeating words, similar phrases and divergent opinions. For each theme, common and peculiar trends,  
687 as well as similar and divergent opinions, will be noted. Themes will be developed and revised  
688 iteratively. Additionally, the manifest and latent contents of the MSDs, FGDs, KIIs and Cis data will be  
689 explored. A summary of findings will be written, and samples of appropriate verbatim quotes will be  
690 provided. Findings of the qualitative data will be used to guide the development of questionnaires for  
691 the cross-sectional and longitudinal studies.

692  
693 *Hoousehold, health facility and longitudinal surveys:* Descriptive analysis of de-identified data from the  
694 household and health facility surveys will be conducted to generate initial estimates of malaria  
695 prevalence by dry and wet season for sampled and unsampled wards in Ibadan and Kano metro. Spatial  
696 interpolation methods will be applied to generate smoothed estimates for all wards borrowing  
697 information from areas with more data, that is, wards sampled in the household surveys, to generate  
698 estimates in areas with fewer data points, that is unsampled wards with malaria test data from the  
699 health facility surveys. Additional analysis will be conducted to estimate bed net use, bed net coverage  
700 and mobility metrics at the ward-level. Regression models will additionally be used to examine the  
701 association between observed malaria prevalence and individual and community-level factors.

702  
703 Descriptive analysis of de-identified data from the longitudinal surveys will be conducted to generate  
704 monthly malaria test positivity rates by RDT among children 0 – 10 years for Ibadan and Kano metro  
705 area. Regression-based methods for repeated measures will be used to examine the association  
706 between individual and community factors and monthly malaria test results

707  
708 Entomological data will be analyzed to evaluate the following: 1) habitat occupancy , 2) types of  
709 *Anopheles* found and the nature of habitats utilized by each species in each site in both seasons, 3) larval  
710 density , 4) man biting rate, 5) human blood index, 6) indoor resting density, and 7) Sporozoite rate. The  
711 Supplement (page 118) provides a detailed description for how these entomological variables will be  
712 assessed. In each study location, *Anopheles* habitat will be geo-referenced and a habitat distribution  
713 map for each area will be created.

714

715 Ward-level mathematical models will be developed using the above entomological parameters and  
716 calibrated to all-age prevalence and incidence data from the field study, to estimate the impact of  
717 intervention scenarios specified by the NMEP on future transmission dynamics.

718

### 719 **Ethics and dissemination**

720 This protocol has been approved by Nigeria's National Health Research Committee and Ethical Review  
721 Committees of Oyo and Kano States Ministry of Health, and Northwestern University. Study participants  
722 will be asked to provide either written or verbal informed consent prior to being recruited into the  
723 study. Separate informed consent forms are provided for each of the components of the study including  
724 qualitative studies, household surveys, health facility surveys, longitudinal surveys, and entomological  
725 surveys (see Supplement). The informed consent forms will be made available in English as well as major  
726 local languages of the study sites (Yoruba and Hausa). In addition, during community mobilization,  
727 information about the study will be presented to the communities and permission will be obtained from  
728 the communities' gatekeepers. They will also be provided information on the process of informed  
729 consent and examples of the informed consent forms will be kept with the communities for review. For  
730 children 0-10 years enrolled in the longitudinal study, written informed consent will be sought from  
731 their parent/guardian. If the parent/guardian accepts participation on behalf of the child, he/she will  
732 be asked to sign two copies of the written informed consent. One copy of the consent form will be given  
733 to the parent/guardian, and another kept by the investigator (household survey) / health worker in the  
734 facility (health facility survey), a photocopy of which will be kept in the investigator's office. Assent will  
735 be obtained from children selected to participate in the study in addition to the parental consent.

736

737 Confidentiality will be ensured to protect the identification and other personal information provided by  
738 the participants. Codes will be used to label data from various sources. We will explain clearly to  
739 participants that information they supply will be properly stored and kept in encrypted files. The data  
740 will be restricted to only authorized persons and stored only for a maximum of 5 – 7 years after which  
741 data will be destroyed after the data would have been published.

742

743 Participants will be given incentives to compensate for the time they spent in participating in the study  
744 as well as a transport fee if applicable. We will express clearly to the participants how we appreciate  
745 their time and efforts. Where necessary and where participants request, we will offer free of charge  
746 supports services such as referral advice and counselling to participants after their participation in the  
747 study.

748

749 An exit briefing/dissemination meeting will be held with all the relevant stakeholders and communities  
750 where the studies are conducted within four weeks upon completion of field work and analysis of the  
751 data. The dissemination meeting will also be used to educate the selected communities on the  
752 transmission of malaria, health and socio-economic impacts and various methods to protect individuals  
753 and communities against malaria. We will also inform participants about how the findings of the study  
754 will be disseminated (e.g., reports, conference presentations, journal articles).

755

756

### 757 **Authors' contributions**

758 IDO conceptualized the study and its design, identified funding for the study, and led writing of the  
759 study protocol. IA, MA, AOO, OS, JA, AF, MB, and AYA led study design, including sample size estimation,  
760 and co-wrote the protocol. EB developed the quantitative questionnaire and supported study design.  
761 PU, CA, and CO provided feedback on the study design and review feedback for the protocol.

762

763 **Funding statement**

764 This work is supported by the Bill and Melinda Gates Foundation (Investment ID: INV-036449)

765

766 **Competing interest statement**

767 All authors declare no competing interests

768

769

770 **Full references**

- 771 1. World Health Organization. Global Framework for the response to malaria in urban areas.  
772 Geneva; 2022.
- 773 2. World Health Organization. World Malaria Report 2022. Geneva; 2022.
- 774 3. United Nations Department of Economic and Social Affairs. World Urbanization Prospects: The  
775 2018 Revision. World Urbanization Prospects: The 2018 Revision. 2019. doi:10.18356/b9e995fe-  
776 en
- 777 4. Tatem AJ, Gething PW, Smith DL, Hay SI. Urbanization and the global malaria recession. *Malar J.*  
778 2013;12: 1–11. doi:10.1186/1475-2875-12-133/FIGURES/4
- 779 5. Mattah PAD, Futagbi G, Amekudzi LK, Mattah MM, De Souza DK, Kartey-Attipoe WD, et al.  
780 Diversity in breeding sites and distribution of Anopheles mosquitoes in selected urban areas of  
781 southern Ghana. *Parasites and Vectors.* 2017;10: 1–15. doi:10.1186/S13071-016-1941-  
782 3/TABLES/5
- 783 6. Georganos S, Brousse O, Dujardin S, Linard C, Casey D, Milliones M, et al. Modelling and mapping  
784 the intra-urban spatial distribution of Plasmodium falciparum parasite rate using very-high-  
785 resolution satellite derived indicators. *Int J Health Geogr.* 2020;19: 1–18. doi:10.1186/S12942-  
786 020-00232-2
- 787 7. Kasali S. NIMR discovers new malaria vector, “Anopheles stephensi” in Northern Nigeria. *Nigerian*  
788 *Tribune.* 2022. Available: [https://tribuneonlineng.com/nimr-discovers-new-malaria-vector-  
789 anopheles-stephensi-in-northern-nigeria/](https://tribuneonlineng.com/nimr-discovers-new-malaria-vector-anopheles-stephensi-in-northern-nigeria/). Accessed 8 Nov 2022.
- 790 8. World Health Organization and UN Habitat. Global framework for the response to malaria in  
791 urban areas. Geneva; 2022. Available: <https://www.who.int/publications/i/item/9789240061781>
- 792 9. Samarasekera U. A missed opportunity? Anopheles stephensi in Africa. *Lancet.* 2022;400: 1914–  
793 1915. doi:10.1016/S0140-6736(22)02483-7
- 794 10. World Health Organization and RBM Partnership to End Malaria. High burden to high impact: a  
795 targeted malaria response. WHO. World Health Organization; 2018. Available:  
796 <https://www.who.int/malaria/publications/atoz/high-impact-response/en/>
- 797 11. World Health Organization (WHO). Global technical strategy for malaria 2016–2030. 2015.  
798 Available:  
799 [https://apps.who.int/iris/bitstream/handle/10665/176712/9789241564991\\_eng.pdf?sequence=  
800 1](https://apps.who.int/iris/bitstream/handle/10665/176712/9789241564991_eng.pdf?sequence=1)
- 801 12. World Health Organization. WHO technical brief for countries preparing malaria funding requests  
802 for the Global Fund (2020–2022). 2020. Available:  
803 <https://www.who.int/publications/i/item/9789240004139>
- 804 13. Alegana VA, Okiro EA, Snow RW. Routine data for malaria morbidity estimation in Africa:  
805 Challenges and prospects. *BMC Med.* 2020;18: 1–13. doi:10.1186/s12916-020-01593-y
- 806 14. The PMI VectorLink Project. The PMI VectorLink Nigeria Annual Entomology Report, November  
807 2018–September 2019. Rockville ; 2019 Jan.
- 808 15. Bello FA, Ayede AI. Prevalence of malaria parasitemia and the use of malaria prevention  
809 measures in pregnant women in Ibadan, Nigeria. *Ann Ibadan Postgrad Med.* 2019;17: 124–129.  
810 Available: [/pmc/articles/PMC7358809/](https://pmc/articles/PMC7358809/)
- 811 16. Olukosi AY, Olakiigbe A, Ajibaye O, Orok BA, Aina OO, Akindele SK, et al. Socio-economic  
812 behavioural indicators of falciparum malaria parasitaemia and moderate to severe anaemia  
813 among pregnant women attending antenatal clinics in Lagos, Southwest Nigeria. *Malar J.*  
814 2020;19. doi:10.1186/S12936-020-03462-8
- 815 17. AA A, OA M, AB O. Knowledge, attitudes and practices about malaria in an urban community in  
816 south-western Nigeria. *J Vector Borne Dis.* 2010;47: 155–159. Available:  
817 <https://pubmed.ncbi.nlm.nih.gov/20834085/>

- 818 18. Fana SA, Bunza MDA, Anka SA, Imam AU, Nataala SU. Prevalence and risk factors associated with  
819 malaria infection among pregnant women in a semi-urban community of north-western Nigeria.  
820 *Infect Dis Poverty*. 2015;4. doi:10.1186/S40249-015-0054-0
- 821 19. Awosolu OB, Yahaya ZS, Haziqah MTF, Simon-Oke IA, Fakunle C. A cross-sectional study of the  
822 prevalence, density, and risk factors associated with malaria transmission in urban communities  
823 of Ibadan, Southwestern Nigeria. *Heliyon*. 2021;7: e05975. doi:10.1016/J.HELIYON.2021.E05975
- 824 20. Klinkenberg E, Mccall PJ, Wilson MD, Akoto AO, Amerasinghe FP, Bates I, et al. Urban malaria and  
825 anaemia in children: a cross-sectional survey in two cities of Ghana. [cited 5 Jan 2023].  
826 doi:10.1111/j.1365-3156.2006.01609.x
- 827 21. Kabaria CW, Molteni F, Mandike R, Chacky F, Noor AM, Snow RW, et al. Mapping intra-urban  
828 malaria risk using high resolution satellite imagery: a case study of Dar es Salaam. *Int J Heal*  
829 *Geogr* 2016 151. 2016;15: 1–12. doi:10.1186/S12942-016-0051-Y
- 830 22. Kabaria CW, Gilbert M, Noor AM, Snow RW, Linard C. The impact of urbanization and population  
831 density on childhood *Plasmodium falciparum* parasite prevalence rates in Africa. *Malar J*.  
832 2017;16: 1–10. doi:10.1186/S12936-017-1694-2/FIGURES/3
- 833 23. Silva PM De, Marshall JM. Factors Contributing to Urban Malaria Transmission in Sub-Saharan  
834 Africa: A Systematic Review. *J Trop Med*. 2012;2012. doi:10.1155/2012/819563
- 835 24. Azrag RS, Mohammed BH. *Anopheles arabiensis* in Sudan: a noticeable tolerance to urban  
836 polluted larval habitats associated with resistance to Temephos. *Malar J* 2018 171. 2018;17: 1–  
837 11. doi:10.1186/S12936-018-2350-1
- 838 25. Awolola TS, Oduola AO, Obansa JB, Chukwurar NJ, Unyimadu JP. *Anopheles gambiae* s.s.  
839 breeding in polluted water bodies in urban Lagos, southwestern Nigeria. *J Vector Borne Dis*.  
840 2007;44: 241–244. Available: <https://pubmed.ncbi.nlm.nih.gov/18092529/>
- 841 26. Baragatti M, Fournet F, Henry M-C, Assi S, Ouedraogo H, Rogier C, et al. Social and environmental  
842 malaria risk factors in urban areas of Ouagadougou, Burkina Faso. *Malar J* 2009 81. 2009;8: 1–14.  
843 doi:10.1186/1475-2875-8-13
- 844 27. Johansen IC, Rodrigues PT, Ferreira MU. Human mobility and urban malaria risk in the main  
845 transmission hotspot of Amazonian Brazil. *PLoS One*. 2020;15.  
846 doi:10.1371/JOURNAL.PONE.0242357
- 847 28. Arinaitwe E, Mpimbaza A, Nankabirwa JI, Kanya V, Asiimwe A, Kuule JK, et al. Malaria Diagnosed  
848 in an Urban Setting Strongly Associated with Recent Overnight Travel: A Case–Control Study from  
849 Kampala, Uganda. *Am J Trop Med Hyg*. 2020;103: 1517–1524. doi:10.4269/AJTMH.20-0189
- 850 29. Ezeh A, Oyebode O, Satterthwaite D, Chen YF, Ndugwa R, Sartori J, et al. The history, geography,  
851 and sociology of slums and the health problems of people who live in slums. *Lancet*. 2017;389:  
852 547–558. doi:10.1016/S0140-6736(16)31650-6
- 853 30. Nuissl H, Heinrichs D. Slums: perspectives on the definition, the appraisal and the management  
854 of an urban phenomenon. *DIE ERDE – J Geogr Soc Berlin*. 2013;144: 105–116.  
855 doi:10.12854/ERDE-144-8
- 856 31. United Nations. Glossary of environment statistics. *Stud Methods*. 1997. doi:10.5860/choice.35-  
857 1887
- 858 32. Sandoval V, Sarmiento JP. A neglected issue: informal settlements, urban development, and  
859 disaster risk reduction in Latin America and the Caribbean. *Disaster Prev Manag An Int J*. 2020;29:  
860 731–745. doi:10.1108/DPM-04-2020-0115/FULL/XML
- 861 33. United Nations Human Settlement Programme. The challenge of slums: global report on human  
862 settlements 2003 . Nairobi ; 2003.
- 863 34. UN-Habitat. Habitat III Issue Papers 22 – Informal Settlements. United Nations Conf Hous Sustain  
864 Urban Dev. 2015;2015: 0–8. Available: [https://unhabitat.org/habitat-iii-issue-papers-22-informal-](https://unhabitat.org/habitat-iii-issue-papers-22-informal-settlements)  
865 settlements

- 866 35. Akinwale OP, Adeneye AK, Musa AZ, Ayodeji KS, Sulyman MA, Oyefara JL, et al. Living conditions  
867 and public health status in three urban slums of Lagos, Nigeria. *Public Heal Orig Res South East*  
868 *Asia J Public Heal South East Asia J Public Heal*. 2014;3: 36–41. Available:  
869 <https://ir.unilag.edu.ng/handle/123456789/8037>
- 870 36. WorldPop and National Population Commission of Nigeria. Bottom-up gridded population  
871 estimates for Nigeria, version 2.0. WorldPop, University of Southampton; 2021.  
872 doi:10.5258/SOTON/WP00729
- 873 37. Center for International Earth Science Information Network - CIESIN - Columbia University.  
874 Gridded Population of the World, Version 4 (GPWv4): Population Density, Revision 11. Palisades,  
875 New York: NASA Socioeconomic Data and Applications Center (SEDAC); 2018.
- 876 38. Fraley C, Raftery AE. Model-Based Clustering, Discriminant Analysis, and Density Estimation.  
877 <https://doi.org/10.1198/016214502760047131>. 2011;97: 611–631.  
878 doi:10.1198/016214502760047131
- 879 39. Center for International Earth Science Information Network - CIESIN - Columbia University.  
880 Gridded Population of the World, Version 4 (GPWv4): Population Density Adjusted to Match  
881 2015 Revision UN WPP Country Totals, Revision 11. Palisades, NY: NASA Socioeconomic Data and  
882 Applications Center (SEDAC); 2018. doi:<https://doi.org/10.7927/H4F47M65>
- 883 40. Brelford C, Martin T, Hand J, Bettencourt LMA. Toward cities without slums: Topology and the  
884 spatial evolution of neighborhoods. *Sci Adv*. 2018;4.  
885 doi:10.1126/SCIADV.AAR4644/SUPPL\_FILE/AAR4644\_SM.PDF
- 886 41. Weiss DJ, Atkinson PM, Bhatt S, Mappin B, Hay SI, Gething PW. An effective approach for gap-  
887 filling continental scale remotely sensed time-series. *Isprs J Photogramm Remote Sens*. 2014;98:  
888 106. doi:10.1016/J.ISPRSJPRS.2014.10.001
- 889 42. Tusting LS, Bisanzio D, Alabaster G, Cameron E, Cibulskis R, Davies M, et al. Mapping changes in  
890 housing in sub-Saharan Africa from 2000 to 2015. *Nat* 2019 5687752. 2019;568: 391–394.  
891 doi:10.1038/s41586-019-1050-5
- 892 43. GRID3. Geo-referenced infrastructure and demographic data for development (GRID3) dump  
893 sites . [cited 14 Feb 2022]. Available: [https://grid3.gov.ng/resource/755746a2-d9fc-4c2e-8947-](https://grid3.gov.ng/resource/755746a2-d9fc-4c2e-8947-f6de23e6be9e?dataset=oyo-dump-sites)  
894 [f6de23e6be9e?dataset=oyo-dump-sites](https://grid3.gov.ng/resource/755746a2-d9fc-4c2e-8947-f6de23e6be9e?dataset=oyo-dump-sites)
- 895 44. PNMCH, WHO. Multi-Stakeholder Dialogues for Women’s and Children’s Health: A Guide for  
896 Conveners and Facilitators. 2014. Available: [www.who.int](http://www.who.int)
- 897 45. van Eijk AM, Hill J, Noor AM, Snow RW, ter Kuile FO. Prevalence of malaria infection in pregnant  
898 women compared with children for tracking malaria transmission in sub-Saharan Africa: a  
899 systematic review and meta-analysis. *Lancet Glob Heal*. 2015;3: e617. doi:10.1016/S2214-  
900 109X(15)00049-2
- 901 46. ICF International. Demographic and Health Survey: Sampling and Household Listing Manual.  
902 Calverton, Maryland; 2012. Available:  
903 [https://www.dhsprogram.com/pubs/pdf/DHSM4/DHS6\\_Sampling\\_Manual\\_Sept2012\\_DHSM4.pdf](https://www.dhsprogram.com/pubs/pdf/DHSM4/DHS6_Sampling_Manual_Sept2012_DHSM4.pdf)  
904 f
- 905 47. Dean A, Sullivan K, Soe M. OpenEpi: Open Source Epidemiologic Statistics for Public Health.  
906 Version 3.0.1. 2013 [cited 14 Nov 2022]. Available: <https://www.openepi.com/>
- 907 48. Fleiss JL, Levin B, Paik MC. Statistical Methods for Rates & Proportions. Wiley; 2013. Available:  
908 [https://www.wiley.com/en-](https://www.wiley.com/en-us/Statistical+Methods+for+Rates+and+Proportions%2C+3rd+Edition-p-9780471526292)  
909 [us/Statistical+Methods+for+Rates+and+Proportions%2C+3rd+Edition-p-9780471526292](https://www.wiley.com/en-us/Statistical+Methods+for+Rates+and+Proportions%2C+3rd+Edition-p-9780471526292)
- 910 49. WHO. Estimated malaria incidence (per 1000 population at risk). 2022 [cited 17 Mar 2022].  
911 Available: [https://www.who.int/data/gho/data/indicators/indicator-details/GHO/malaria-](https://www.who.int/data/gho/data/indicators/indicator-details/GHO/malaria-incidence-(per-1-000-population-at-risk))  
912 [incidence-\(per-1-000-population-at-risk\)](https://www.who.int/data/gho/data/indicators/indicator-details/GHO/malaria-incidence-(per-1-000-population-at-risk))
- 913 50. Wangdi K, Furuya-Kanamori L, Clark J, Barendregt JJ, Gattton ML, Banwell C, et al. Comparative



914 effectiveness of malaria prevention measures: a systematic review and network meta-analysis.  
915 Parasit Vectors. 2018;11. doi:10.1186/S13071-018-2783-Y  
916 51. Gillies MT (Michael T, Coetzee M. A supplement to the anophelinae of Africa south of the Sahara  
917 (Afrotropical Region). Johannesburg: South African Institute for Medical Research; 1987.  
918 52. Gillett JD (John D, Smith JG. Common African mosquitos and their medical importance. 1972;  
919 106.  
920 53. Adeleke MA, Mafiana CF, Idowu AB, Adekunle MF, Sam-Wobo SO. Mosquito larval habitats and  
921 public health implications in Abeokuta, Ogun State, Nigeria. Tanzan J Health Res. 2008;10: 103–  
922 107. doi:10.4314/THRB.V10I2.14348  
923  
924  
925  
926  
927  
928
